# Supplementary material for: Complications and Outcomes in 39,864 Patients Receiving Standard Care Plus Mechanical Circulatory Support or Standard Care Alone for Infarct-Associated Cardiogenic Shock
Source: MDPI journal article supplement (doi:10.3390/jcm13041167), 2024-02-19
Supplement: s1 [file s1]

**Supplemental Table S1: ICD-10-GM Codes/ OPS diagnosis  
and procedure codes for data retrieval**

| <b>International classification of disease 10th Revision,<br/>German Modification (ICD-10 GM)</b> | <b>Code</b>                              |
|---------------------------------------------------------------------------------------------------|------------------------------------------|
| Acute myocardial infarction (AMI)                                                                 | I21.-; I22.-                             |
| Previous myocardial infarction (MI)                                                               | I21.-; I22.-                             |
| Cerebrovascular Disease (CVD)                                                                     | I65.-; I66.-; I67.2                      |
| Previous stroke                                                                                   | I63.-; I64.-; I69.3; I69.4               |
| Hypertension                                                                                      | I10.-; I11.-; I12.-; I13.-; 15.-         |
| Diabetes mellitus (DM)                                                                            | E10.-; E11.-; E12.-; E13.-; E14.-        |
| Dyslipidemia                                                                                      | E78.-                                    |
| Obesity                                                                                           | E66.-                                    |
| Smoking                                                                                           | F17.-                                    |
| Chronic heart failure (CHF)                                                                       | I50.-                                    |
| Chronic kidney disease (CKD)                                                                      | N18.- ; N19.-                            |
| Diseased Coronary Vessels: 1                                                                      | I25.11 (and no I25.12 or I25.13)         |
| Diseased Coronary Vessels: 2                                                                      | I25.12 (and no I25.13)                   |
| Diseased Coronary Vessels: 3                                                                      | I25.13                                   |
| Shock                                                                                             | T81.1; R57.0                             |
| Acute stroke                                                                                      | I63.-; I64.-                             |
| Hemorrhagic stroke                                                                                | I60.-; I61.-; I62.-                      |
|                                                                                                   |                                          |
| Bleeding                                                                                          | K92.-; H44.8; T81.0; T81.2; T81.3; T81.7 |
| Sepsis                                                                                            | A41;                                     |
| Acute Renal Failure (ARF)                                                                         | N17;                                     |
| Previous (coronary artery bypass grafting) CABG                                                   | Z95.1 (with additional OPS codes)        |
| Previous heart Valve implantation                                                                 | Z95.2 (with additional OPS codes)        |
|                                                                                                   |                                          |
| <b>German procedure classification system (OPS)</b>                                               |                                          |
| Blood transfusion                                                                                 | 8-800.0; 8-800.1; 8-800.c                |
| Percutaneous coronary intervention (PCI) (previous or current)                                    | 8-837;                                   |
| Current CABG                                                                                      | 5-36 (with additional ICD codes)         |

|                                                              |                                                        |
|--------------------------------------------------------------|--------------------------------------------------------|
| Current valve implantation                                   | 5-351; 5-352; 5-353; 5-354 (with additional ICD codes) |
| In-hospital-resuscitation                                    | 8-771                                                  |
| IABP                                                         | 8-83a.0                                                |
| Impella                                                      | 8-83a.3                                                |
| Veno-arterial extracorporeal membrane oxygenation (V-A ECMO) | 8-852.3                                                |

| <b>Supplemental Table S2: Baseline characteristics (pooled)</b> |                               |                           |                |
|-----------------------------------------------------------------|-------------------------------|---------------------------|----------------|
|                                                                 | <b>no tMCS<br/>(n=32,804)</b> | <b>tMCS<br/>(n=7,060)</b> | <b>P-value</b> |
| Male, n (%)                                                     | 19,615 (59.8)                 | 4,855 (68.8)              | <0.001         |
| No of diseased coronary vessels: 0, n (%)                       | 7,308 (22.3)                  | 396 (5.61)                | <0.001         |
| No of diseased coronary vessels: 1, n (%)                       | 4,056 (12.4)                  | 744 (10.5)                | <0.001         |
| No of diseased coronary vessels: 2, n (%)                       | 5,922 (18.1)                  | 1,228 (17.4)              | 0.19           |
| No of diseased coronary vessels: 3, n (%)                       | 15,518 (47.3)                 | 4,692 (66.5)              | <0.001         |
| Arterial hypertension, n (%)                                    | 28,907 (88.1)                 | 6,009 (85.1)              | <0.001         |
| Diabetes, n (%)                                                 | 17,073 (52.1)                 | 3,650 (51.7)              | 0.60           |
| Dyslipidemia, n (%)                                             | 21,893 (66.8)                 | 4,954 (70.2)              | <0.001         |
| Obesity, n (%)                                                  | 8,850 (27.0)                  | 2,061 (29.2)              | <0.001         |
| Smoking, n (%)                                                  | 6,522 (19.9)                  | 1,685 (23.9)              | <0.001         |
| Previous myocardial infarction, n (%)                           | 9,653 (29.4)                  | 2,396 (33.9)              | <0.001         |
| Previous stroke, n (%)                                          | 5,097 (15.5)                  | 832 (11.8)                | <0.001         |
| Previous PCI, n (%)                                             | 2,356 (7.18)                  | 593 (8.40)                | <0.001         |
| Previous CABG, n (%)                                            | 2,728 (8.32)                  | 526 (7.45)                | 0.02           |
| Previous valve replacement, n (%)                               | 429 (1.31)                    | 53 (0.75)                 | <0.001         |
| Chronic heart failure, n (%)                                    | 23,244 (70.9)                 | 5,463 (77.4)              | <0.001         |
| Chronic kidney disease, n (%)                                   | 14,090 (43.0)                 | 2,788 (39.5)              | <0.001         |
| Chronic kidney disease with dialysis, n (%)                     | 6,340 (19.3)                  | 1,123 (15.9)              | <0.001         |

Abbreviations: tMCS – temporary mechanical circulatory support; IABP - intra-aortic balloon pump; V-A ECMO – veno-arterial extracorporeal membrane oxygenation; IQR – interquartile range; PCI – percutaneous coronary intervention; CABG – coronary artery bypass graft

#### Supplemental Table S3: Cox regression

|                                | <b>Hazard ratio<br/>(95% CI)</b> | <b>P-Value</b> |
|--------------------------------|----------------------------------|----------------|
| Female gender                  | 1.02 (1.00-1.05)                 | 0.079          |
| IABP                           | 0.89 (0.86-0.92)                 | <0.001         |
| Impella                        | 1.25 (1.15-1.35)                 | <0.001         |
| V-A ECMO                       | 1.57 (1.45-1.69)                 | <0.001         |
| Age                            | 1.04 (1.04-1.04)                 | <0.001         |
| Arterial hypertension          | 0.83 (0.80-0.86)                 | <0.001         |
| Diabetes                       | 1.22 (1.19-1.25)                 | <0.001         |
| Dyslipidemia                   | 0.73 (0.71-0.75)                 | <0.001         |
| Obesitas                       | 1.03 (1.00-1.06)                 | 0.036          |
| Smoking                        | 0.92 (0.89-0.95)                 | <0.001         |
| Previous myocardial infarction | 0.73 (0.71-0.75)                 | <0.001         |
| Previous stroke                | 1.22 (1.18-1.26)                 | <0.001         |
| Previous PCI                   | 1.27 (1.21-1.32)                 | <0.001         |
| Previous CABG surgery          | 1.19 (1.14-1.24)                 | <0.001         |
| Previous valve replacement     | 1.28 (1.16-1.42)                 | <0.001         |
| Chronic heart failure          | 0.71 (0.69-0.73)                 | <0.001         |
| Chronic kidney disease         | 0.98 (0.95-1.00)                 | 0.087          |

Abbreviations: CI - confidence interval; IABP - intra-aortic balloon pump; V-A ECMO – veno-arterial extracorporeal membrane oxygenation; PCI – percutaneous coronary intervention; CABG – coronary artery bypass graft
